# Supplementary material for: Polymer-coated graphene films as anti-reflective transparent electrodes for Schottky junction solar cells
Source: Royal Society of Chemistry journal article supplement (doi:10.1039/c6ta06261j), 2016-01-01
Supplement: c6ta06261j1.pdf [file c6ta06261j1.pdf]

**Electronic Supplementary Information for**

**Polymer-Coated Graphene Films as Anti-Reflective Transparent  
Electrodes for Schottky Junction Solar Cells**

*Xin Gan*<sup>ac</sup>, *Ruitao Lv*<sup>\*b</sup>, *Haoyue Zhu*<sup>d</sup>, *Lai-Peng Ma*<sup>e</sup>, *Xuyang Wang*<sup>b</sup>, *Zexia Zhang*<sup>a</sup>,  
*Zheng-Hong Huang*<sup>a</sup>, *Hongwei Zhu*<sup>a</sup>, *Wencai Ren*<sup>e</sup>, *Mauricio Terrones*<sup>dfg</sup> and *Feiyu  
Kang*<sup>\*ac</sup>

<sup>a</sup> State Key Laboratory of New Ceramics and Fine Processing, School of Materials Science  
and Engineering, Tsinghua University, Beijing 100084, China

<sup>b</sup> Key Laboratory of Advanced Materials (MOE), School of Materials Science and  
Engineering, Tsinghua University, Beijing 100084, China

<sup>c</sup> Graduate School at Shenzhen of Tsinghua University, Shenzhen 518055, China

<sup>d</sup> Department of Physics and Center for 2-Dimensional and Layered Materials, The  
Pennsylvania State University, University Park, PA 16802, USA

<sup>e</sup> Shenyang National Laboratory for Materials Science, Institute of Metal Research, Chinese  
Academy of Science, Shenyang 110016, China

<sup>f</sup> Institute of Carbon Science and Technology, Shinshu University, Wakasato 4-17-1,  
Nagano 380-8553, Japan

<sup>g</sup> Department of Chemistry and Department of Materials Science and Engineering, The  
Pennsylvania State University, University Park, PA 16802, USA

\* Addresses correspondence to [lvruitao@tsinghua.edu.cn](mailto:lvruitao@tsinghua.edu.cn) and [fykang@tsinghua.edu.cn](mailto:fykang@tsinghua.edu.cn).

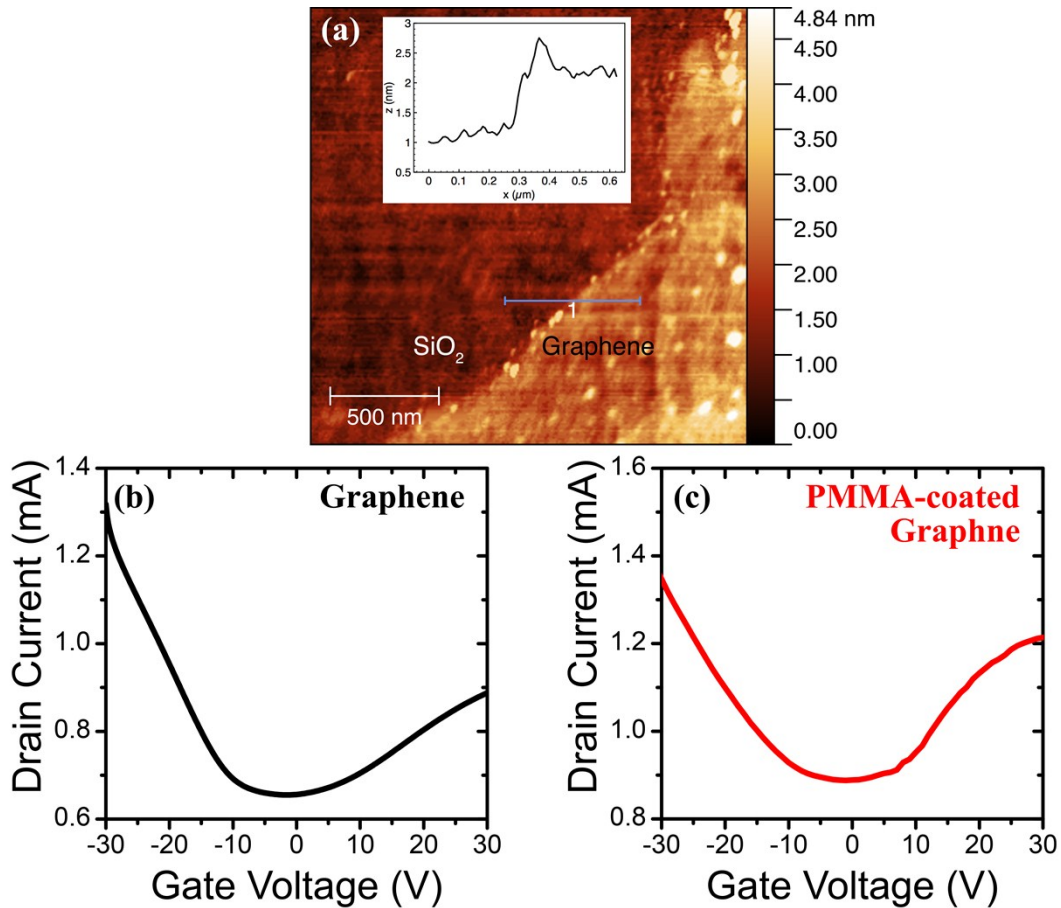

**Fig. S1.** (a) Atomic force microscope image of as-synthesized graphene sample on SiO<sub>2</sub>/Si wafer. Inset is the height profile along the blue line. The bright dots (higher particles) might be PMMA residue induced during transfer. The thickness of the graphene is  $\sim 1$  nm. Characteristics of  $I_{\text{ds}}-V_{\text{g}}$  of the field effect transistors (FET) fabricated with (b) bare graphene film and (c) PMMA-coated graphene. The drain-to-source voltage  $V_{\text{ds}}$  was set at 2.0 V. The graphene sample was the same as those used in the fabrication of G/Si solar cells. Graphene sample with PMMA coating was first transferred on to Si wafer with 300 nm SiO<sub>2</sub>. After removing PMMA with acetone, the source and drain electrodes were formed by using conductive silver paste. Gate electrode was formed by applying eutectic Ga-In alloy onto the back side of the wafer.

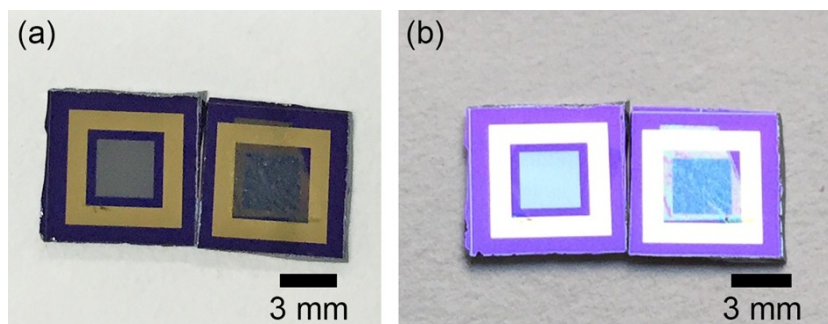

**Fig. S2.** Digital photo of PMMA-removed (left) and PMMA-coated (right) G/Si solar cells under the illumination of (a) fluorescent lamp and (b) sunlight.

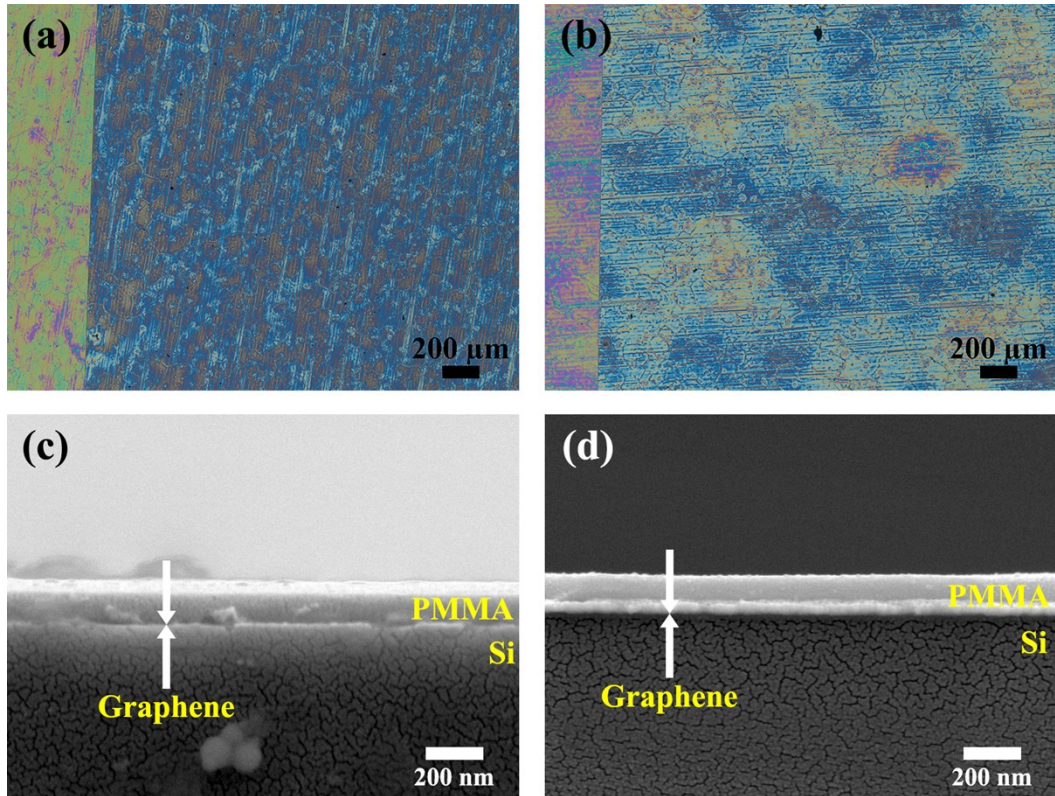

**Fig. S3.** Optical microscope images of G/Si solar cells with PMMA coated at (a) 3000 rpm and (b) 1000 rpm. Cross-section SEM images of G/Si solar cells with PMMA coated at (c) 3000 rpm and (d) 1000 rpm. The solution used was 4 wt% PMMA ( $M_w \approx 50,000 \text{ mol g}^{-1}$ ) in ethyl lactate. By using the cross-section SEM images, thicknesses the PMMA layer coated at 3000 and 1000 rpm are measured as 94 and 133 nm, respectively.

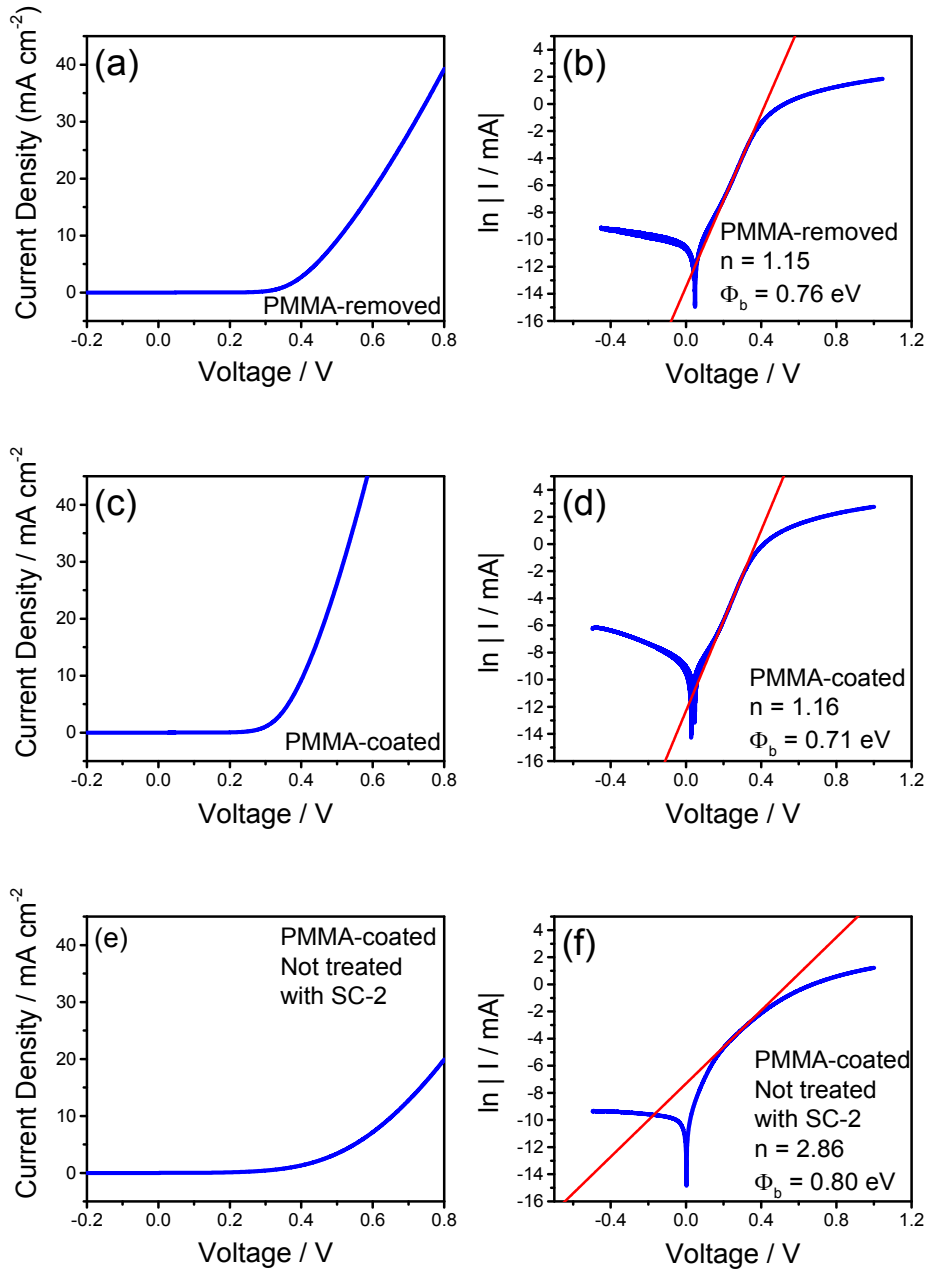

**Fig. S4.** (a) Dark  $J$ - $V$  curve of PMMA-removed G/Si solar cells and (b) corresponding logarithm plot. (c) Dark  $J$ - $V$  curve of PMMA-coated (2000 rpm) G/Si solar cells and (b) corresponding logarithm plot. (e) Dark  $J$ - $V$  curve of PMMA-coated G/Si solar cells (without SC-2 treatment on graphene sample) and (f) corresponding logarithm plot. To determine the ideality factor from the logarithm plots, linear fittings are applied in the voltage range of 0.2-0.3 V.

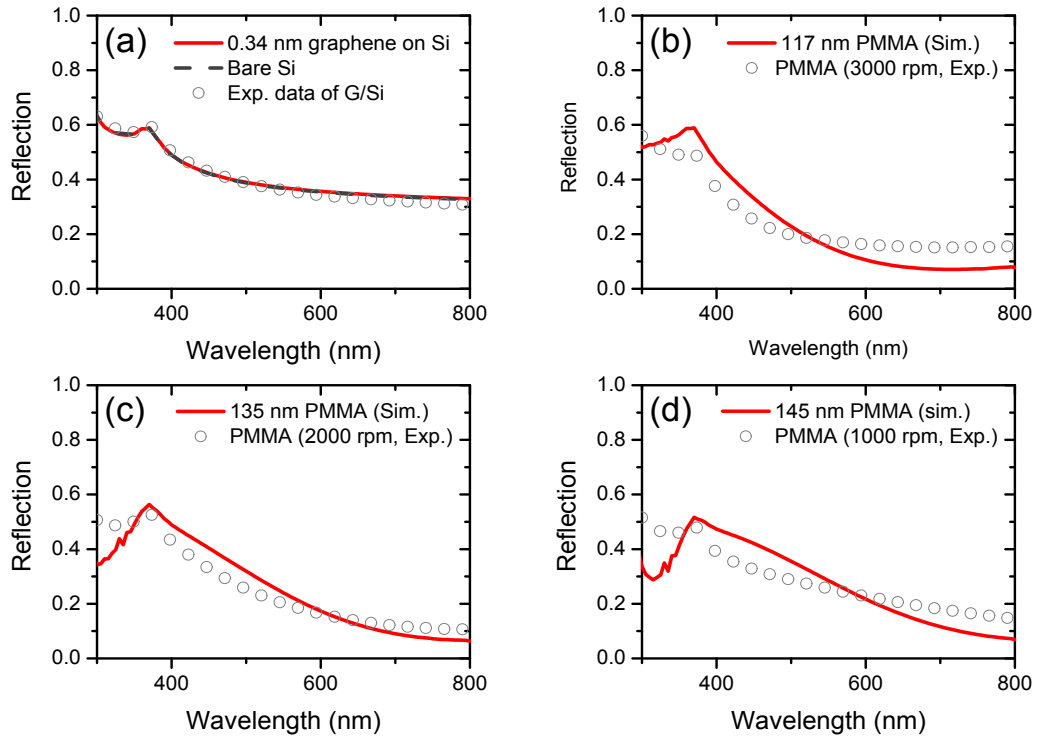

**Fig. S5.** Simulated reflectance spectra of (a) bare Si and graphene-coated Si. Simulated reflectance spectra of planar G/Si solar cells coated with PMMA layers with thicknesses of (b) 117 nm, (c) 135 nm and (d) 145 nm. The experimental data of (a) graphene on Si and (b–d) PMMA-coated G/Si are also plotted as circles.

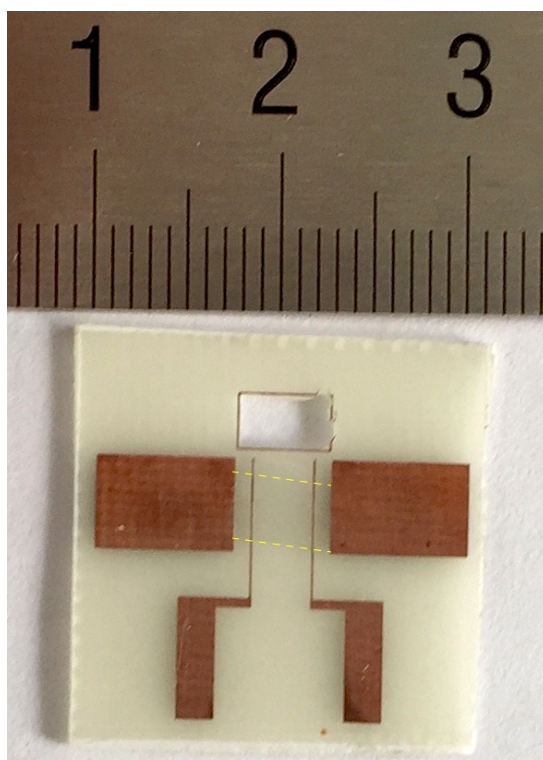

**Fig. S6.** Digital photo of the patterned print circuit board (PCB) used for resistance measurements of polymer-coated graphene. Graphene sample was transferred between two yellow dash lines.

**Table S1.** Morphology parameters of various polymer-coated graphene samples on Si wafer.

| Sample                                              | Average thickness [nm] | Rooted mean squared roughness [nm] | Minimum thickness [nm] | Maximum thickness [nm] |
|-----------------------------------------------------|------------------------|------------------------------------|------------------------|------------------------|
| PMMA coated at 1000 rpm [a]                         | 134.2                  | 19.7                               | 86.4                   | 177.0                  |
| PMMA coated at 1000 rpm, HNO <sub>3</sub> doped [a] | 133.5                  | 21.8                               | 75.9                   | 183.4                  |
| PMMA coated at 2000 rpm [a]                         | 108.4                  | 19.5                               | 55.8                   | 143.1                  |
| PMMA coated at 2000 rpm, HNO <sub>3</sub> doped [a] | 109.4                  | 18.1                               | 58.5                   | 156.8                  |
| PMMA coated at 3000 rpm [a]                         | 89.0                   | 13.2                               | 57.6                   | 118.2                  |
| PMMA coated at 3000 rpm, HNO <sub>3</sub> doped [a] | 90.1                   | 8.9                                | 58.5                   | 119.5                  |
| PMMA coated at 1000 rpm [b]                         | 257.1                  | 65.2                               | 49.5                   | 384.1                  |
| PMMA coated at 3000 rpm [b]                         | 138.7                  | 24.1                               | 65.1                   | 195.3                  |
| PMMA coated at 5000 rpm [b]                         | 71.5                   | 8.4                                | 53.1                   | 91.2                   |
| CYTOP coated at 5000 rpm                            | 96.0                   | 74.3                               | 83.3                   | 115.4                  |

[a] 4 wt% PMMA ( $M_w \approx 50000 \text{ g mol}^{-1}$ ) in ethyl lactate. [b] 3 wt% PMMA ( $M_w \approx 550000 \text{ g mol}^{-1}$ ) in anisole.



**Table S2.** Photovoltaic properties of various G/Si solar cell samples.

| Sample                                          | $V_{oc}$ [V] | $J_{sc}$ [ $\text{mA cm}^{-2}$ ] | FF [%] | PCE [%] |
|-------------------------------------------------|--------------|----------------------------------|--------|---------|
| PMMA removed #1 [a]                             | 0.428        | 22.61                            | 32.22  | 3.12    |
| PMMA removed #1 [b]                             | 0.559        | 25.16                            | 66.84  | 9.40    |
| PMMA removed #1 after 66 days [b]               | 0.444        | 19.39                            | 28.81  | 2.48    |
| PMMA removed #2 [a]                             | 0.489        | 23.39                            | 36.90  | 4.22    |
| PMMA removed #2 [b]                             | 0.538        | 25.21                            | 61.56  | 8.35    |
| PMMA removed #2 after 66 days [b]               | 0.438        | 21.08                            | 27.52  | 2.49    |
| PMMA coated at 2000 rpm #1 [a, c]               | 0.427        | 33.64                            | 45.56  | 6.55    |
| PMMA coated at 2000 rpm #1 [b, c]               | 0.556        | 34.00                            | 70.63  | 13.34   |
| PMMA coated at 2000 rpm #1 after 72 days [b, c] | 0.418        | 30.03                            | 27.74  | 3.74    |
| PMMA coated at 2000 rpm #2 [a, c]               | 0.386        | 32.70                            | 35.00  | 4.42    |
| PMMA coated at 2000 rpm #3 [a, c]               | 0.414        | 34.58                            | 35.29  | 5.05    |
| PMMA coated at 1000 rpm [a, c]                  | 0.406        | 29.40                            | 39.95  | 4.76    |
| PMMA coated at 1000 rpm [b, c]                  | 0.548        | 29.41                            | 69.03  | 11.12   |
| PMMA coated at 3000 rpm [a, c]                  | 0.372        | 27.79                            | 33.77  | 3.49    |
| PMMA coated at 3000 rpm [b, c]                  | 0.524        | 32.10                            | 67.07  | 11.29   |
| PMMA coated at 1000 rpm [a, d]                  | 0.392        | 26.20                            | 37.80  | 3.88    |
| PMMA coated at 1000 rpm [b, d]                  | 0.548        | 28.38                            | 72.72  | 11.31   |
| PMMA coated at 3000 rpm [a, d]                  | 0.408        | 27.81                            | 31.74  | 3.60    |
| PMMA coated at 3000 rpm [b, d]                  | 0.557        | 29.98                            | 68.86  | 11.50   |
| PMMA coated at 5000 rpm [a, d]                  | 0.390        | 29.98                            | 40.26  | 4.71    |
| PMMA coated at 5000 rpm [b, d]                  | 0.543        | 30.73                            | 70.00  | 11.67   |
| CYTOP coated #1 [a]                             | 0.393        | 27.61                            | 32.65  | 3.54    |
| CYTOP coated #1 [b]                             | 0.523        | 32.52                            | 66.97  | 11.39   |
| CYTOP coated #1 after 72 days [b]               | 0.448        | 29.44                            | 48.00  | 6.33    |
| CYTOP coated #2 [b]                             | 0.391        | 27.17                            | 33.98  | 3.61    |
| CYTOP coated #3 [b]                             | 0.380        | 27.13                            | 33.58  | 3.46    |

[a] Pristine device. [b]  $\text{HNO}_3$  doped device. [c] Coated by PMMA with  $M_w \approx 50000 \text{ g mol}^{-1}$ .

[d] Coated by PMMA with  $M_w \approx 550000 \text{ g mol}^{-1}$ .

**Table S3.** Performances of G/Si solar cells with TiO<sub>2</sub> coatings.

| Sample                         | $V_{oc}$ [V] | $J_{sc}$ [mA cm <sup>-2</sup> ] | $J_{sat}$ [mA cm <sup>-2</sup> ] | FF [%] | PCE [%] |
|--------------------------------|--------------|---------------------------------|----------------------------------|--------|---------|
| TiO <sub>2</sub> coated #1 [a] | 0.387        | 5.58                            | 33.56                            | 15.80  | 0.34    |
| TiO <sub>2</sub> coated #1 [b] | 0.499        | 9.78                            | 33.27                            | 15.29  | 0.75    |
| TiO <sub>2</sub> coated #2 [a] | 0.433        | 21.72                           | 33.48                            | 20.65  | 1.94    |
| TiO <sub>2</sub> coated #2 [b] | 0.484        | 10.51                           | 32.58                            | 14.14  | 0.72    |
| TiO <sub>2</sub> coated #3 [a] | 0.137        | 10.09                           | 32.23                            | 25.19  | 0.35    |
| TiO <sub>2</sub> coated #3 [b] | 0.479        | 6.11                            | 33.31                            | 13.34  | 0.39    |

[a] Pristine device. [b] HNO<sub>3</sub> doped device

**Table S4.** Performances of G/Si solar cell fabricated with PMMA-coated ( $M_w \approx 50000$  g mol<sup>-1</sup>, 2000 rpm) graphene samples without SC-2 treatment.

| Sample          | $V_{oc}$ [V] | $J_{sc}$ [mA cm <sup>-2</sup> ] | FF [%] | PCE [%] | Series Resistance [ $\Omega$ ] |
|-----------------|--------------|---------------------------------|--------|---------|--------------------------------|
| Without SC-2 #1 | 0.346        | 8.31                            | 20.4   | 0.59    | 127                            |
| Without SC-2 #2 | 0.341        | 9.42                            | 19.9   | 0.64    | 83                             |
